# Supplementary material
Source: publisher figshare collection journal article supplement (https://acs.figshare.com/ndownloader/files/4233106)
Supplement: Supplementary file 1 [file 4233106]

## Supporting Information

### **Mechanistic Studies of O<sub>2</sub> Reduction Effected by Group 9 Bimetallic Hydride Complexes**

Thomas S. Teets and Daniel G. Nocera\*

*Department of Chemistry, 6-335, Massachusetts Institute of Technology, 77 Massachusetts Avenue, Cambridge, MA 02139-4307*

nocera@mit.edu

| <i>Index</i>                                                              | <i>Page</i> |
|---------------------------------------------------------------------------|-------------|
| Electronic absorption spectra of <b>2</b> , <b>3</b> , and <b>5 – 7</b> . | S2 – S3     |
| <sup>31</sup> P{ <sup>1</sup> H} NMR spectra of <b>6</b> and <b>7</b>     | S4          |

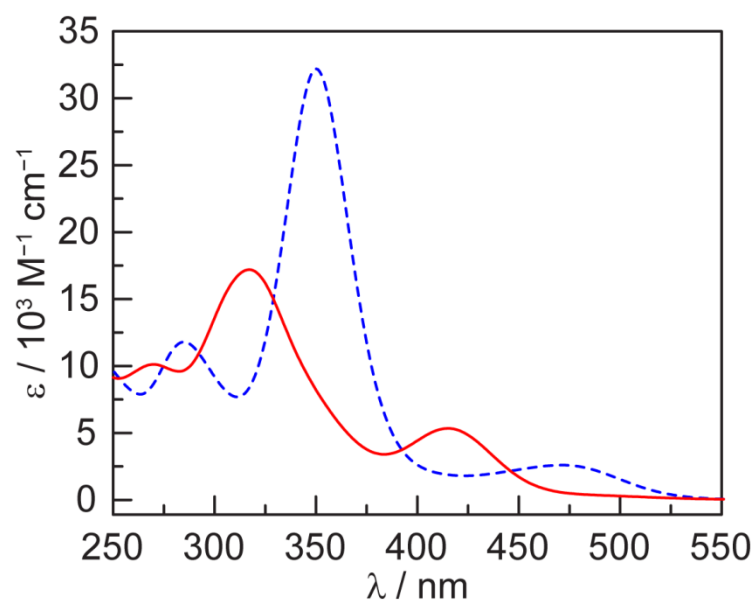

**Figure S1.** Overlaid electronic absorption spectra of **2** (—, red) and **3** (---, blue), recorded at 295 K in THF.

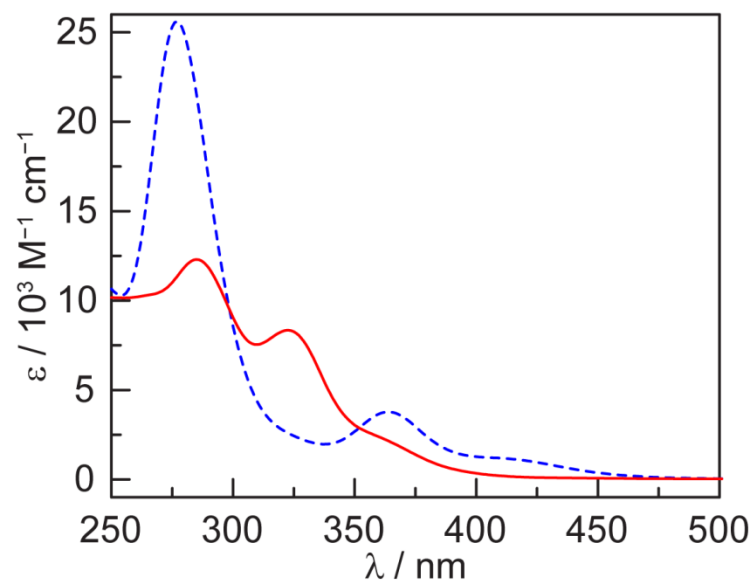

**Figure S2.** Overlaid electronic absorption spectra of **5** (—, red) and **6** (---, blue), recorded at 295 K in THF.

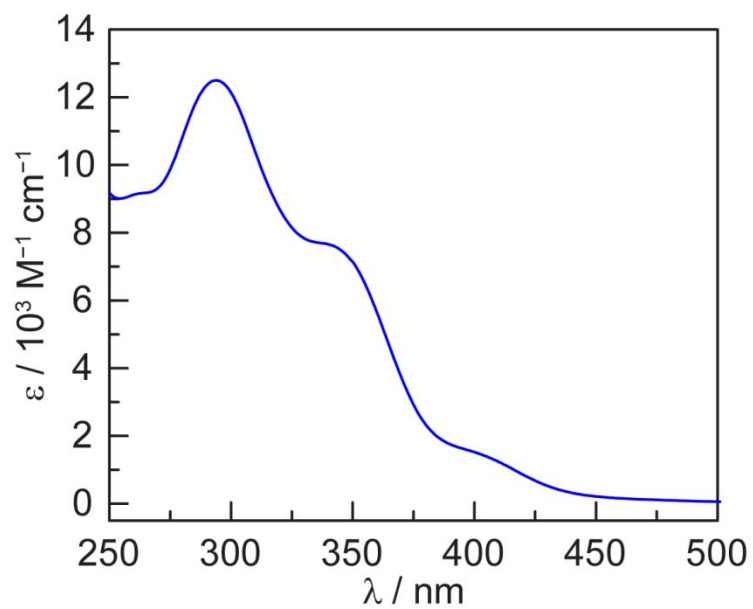

**Figure S3.** Electronic absorption spectrum of **7**, recorded at 295 K in THF.

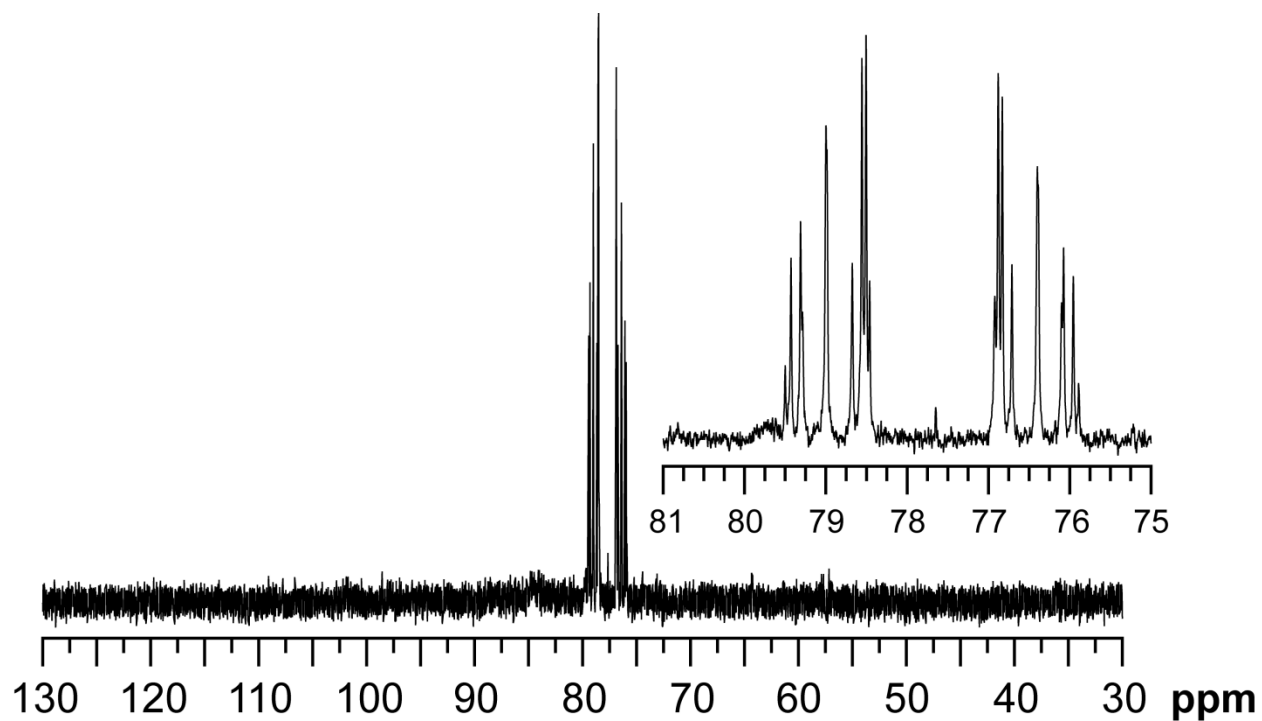

**Figure S4.**  $^{31}\text{P}\{^1\text{H}\}$  NMR spectrum of **6**, recorded at 293 K and 121.5 MHz in  $\text{CD}_3\text{CN}$ . The inset shows an expansion of the spectrum.

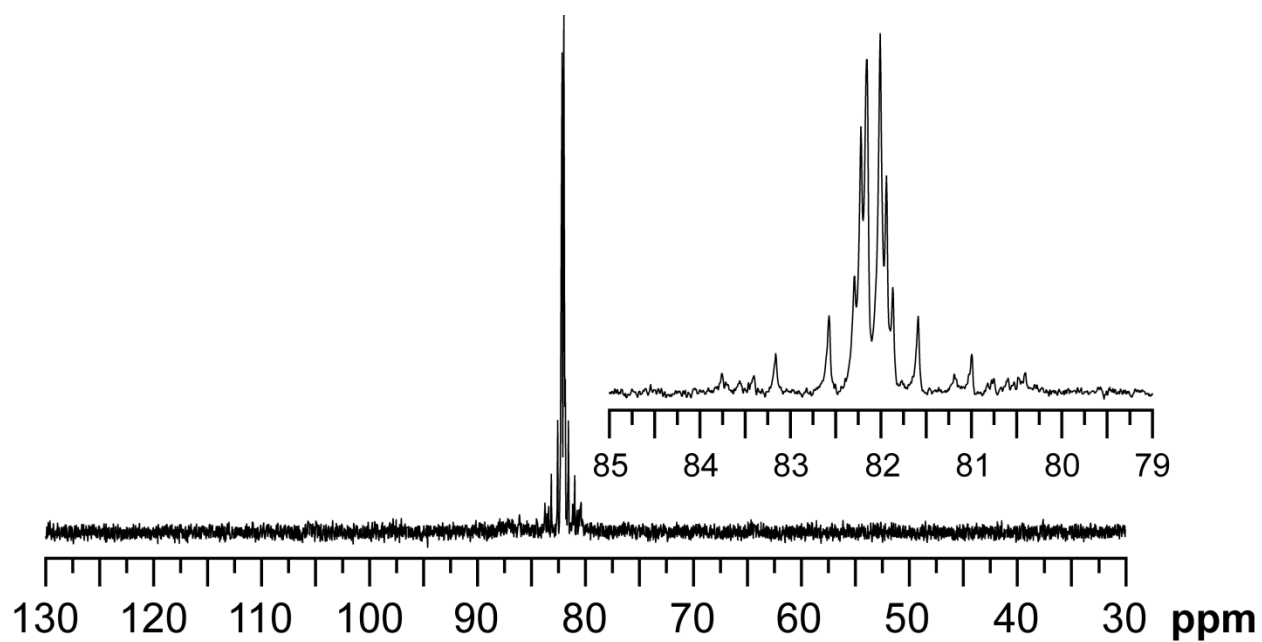

**Figure S5.**  $^{31}\text{P}\{^1\text{H}\}$  NMR spectrum of **7**, recorded at 293 K and 121.5 MHz in  $\text{CD}_3\text{CN}$ . The inset shows an expansion of the spectrum.
